# Supplementary material for: Space and Time Resolved Detection of Platelet Activation and von Willebrand Factor Conformational Changes in Deep Suspensions
Source: Hindawi journal article supplement (doi:10.1155/2017/8318906), 2017-01-01
Supplement: f1 [file 8318906.f1.pdf]

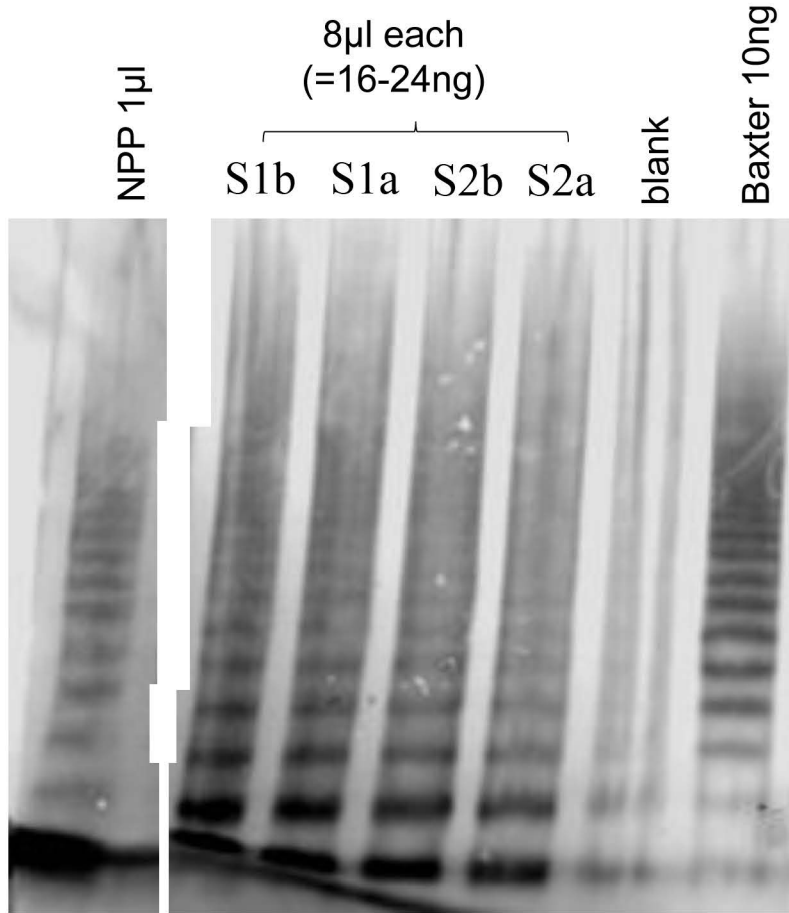

Biorad gel tray; 1.0% HGT(P); 30ml

Electrophoresis 40mA for 3 hours

Transfer at 400mA for 4 hours

1st Ab; anti-VWF pAb 1: 2,000 for O/N

2nd Ab: LiCOR anti-rabbit 1:20,000 for 1 hour

**S1b no EDTA no ADAMTS13, before shear; 3 $\mu$ g/ml**

**S1a no EDTA with ADAMTS13, after shear; 2 $\mu$ g/ml**

**S2b + EDTA no ADAMTS13, before shear; 3 $\mu$ g/ml**

**S2a + EDTA with ADAMTS13, after shear; 2 $\mu$ g/ml**

# Western blotting

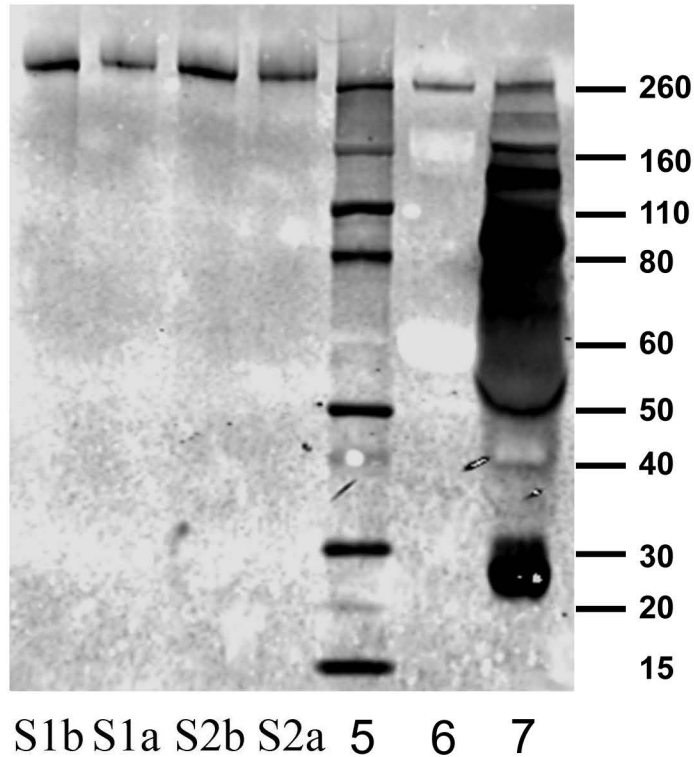

4-12% Tris-Bis Reduced  
anti-VWF pAb

- S1b no EDTA no ADAMTS13, before shear; 3 $\mu$ g/ml
- S1a no EDTA with ADAMTS13, after shear; 2 $\mu$ g/ml
- S2b + EDTA no ADAMTS13, before shear; 3 $\mu$ g/ml
- S2a + EDTA with ADAMTS13, after shear; 2 $\mu$ g/ml

loaded 20  $\mu$ l each (=40-60ng)

5- MW Marker

6- rVWF from Baxter (20ng)

7- NPP (2  $\mu$ L)
